# Supplementary material for: Comprehensive molecular characterisation of epilepsy-associated glioneuronal tumours
Source: Springer Nature journal article supplement (doi:10.1007/s00401-017-1773-z), 2017-10-20
Supplement: MOESM1 [file 15152336]

## **Comprehensive molecular characterisation of epilepsy-associated glioneuronal tumours**

Acta Neuropathologica

Thomas J Stone<sup>1,4</sup>, Angus Keeley<sup>2</sup>, Alex Virasami<sup>4</sup>, William Harkness<sup>5</sup>, Martin Tisdall<sup>5</sup>, Elisa Izquierdo Delgado<sup>9</sup>, Alice Gutteridge<sup>8</sup>, Tony Brooks<sup>3</sup>, Mark Kristiansen<sup>3</sup>, Jane Chalker<sup>7</sup>, Lisa Wilkhu<sup>7</sup>, William Mifsud<sup>4</sup>, John Apps<sup>1</sup>, Maria Thom<sup>11</sup>, Mike Hubank<sup>10</sup>, Tim Forshe<sup>8</sup>, J Helen Cross<sup>2</sup>, Darren Hargrave<sup>6</sup>, Jonathan Ham<sup>1</sup>, Thomas S Jacques<sup>1,4</sup>

Developmental Biology and Cancer Programme<sup>1</sup>, Developmental Neuroscience Programme<sup>2</sup> and UCL Genomics<sup>3</sup>, UCL Great Ormond Street Institute of Child Health, London WC1N 1EH, UK

Departments of Histopathology<sup>4</sup>, Neurosurgery<sup>5</sup>, Haematology and Oncology<sup>6</sup> and Haematology, Cellular and Molecular Diagnostics Service<sup>7</sup>, Great Ormond Street Hospital for Children NHS Foundation Trust, Great Ormond Street, London WC1N 3JH, UK

Department of Pathology<sup>8</sup>, UCL Cancer Institute, London, WC1E 6DD  
Glioma Team, Division of Molecular Pathology and Cancer Therapeutics<sup>9</sup>, The Institute of Cancer Research, London, SM2 5NG

Centre for Molecular Pathology<sup>10</sup>, Royal Marsden Hospital, London, SM2 5NG  
Department of Clinical and Experimental Epilepsy<sup>11</sup>, UCL Institute of Neurology, London, WC1N 3BG

Author for correspondence:

Dr Thomas S Jacques

Email: [t.jacques@ucl.ac.uk](mailto:t.jacques@ucl.ac.uk)

Contents:

**Online Resource 1:** Incidence of glioneuronal tumours across epilepsy surgical series. Reported frequencies for ganglioglioma, DNET, and mixed glioneuronal tumours (DNET/GG & GNT NOS) in large epilepsy surgical series demonstrate significant unexplained variability. Adapted from Thom *et al.* [15]

**Online Resource 2:** Cumulative distribution function delta area plots for consensus clustering of expression **(a)** and methylation **(b)** data. To determine the optimum number of groups within each cohort, the  $k$  corresponding to the first downwards inflection in the cumulative distribution function plot was used. This represents the point at which further subdividing the cohort into additional groups explains little additional variability in the biological data.

**Online Resource 3:** Gene set enrichment statistics for the comparison of astrocytic and oligodendrocyte precursor gene sets between Methyl Group 1 and 2 tumours.  $N$  = Number of genes within the gene set.  $DE$  = Number of differentially methylated gene set genes.

**Online Resource 4:** Segregation of cases by immunohistochemistry for CCND1, CSPG4, and PDGFRA and concordance with molecular classification. Cases were reviewed and segregated into two groups by a pathologist blinded to molecular classification and histological diagnosis.

**Online Resource 5:** Summary of molecular findings for all cases classified by RNA sequencing and 450k methylation array.

**Online Resource 1:** Incidence of glioneuronal tumours across epilepsy surgical series. Reported frequencies for ganglioglioma, DNET, and mixed glioneuronal tumours (DNET/GG & GNT NOS) in large epilepsy surgical series demonstrate significant unexplained variability. Adapted from Thom *et al.* [16]

| <b>Series</b>        | <b>Total No.</b> | <b>No. GNT</b> | <b>DNET</b> | <b>Ganglioglioma</b> | <b>DNET/GG</b> | <b>GNT NOS</b> |
|----------------------|------------------|----------------|-------------|----------------------|----------------|----------------|
| NHNN, London (Adult) | 155              | 125            | 88 (57%)    | 12 (8%)              | 5 (3%)         | 10 (6%)        |
| Kings, London        | 92               | 80             | 74 (80%)    | 6 (7%)               | N/A            | N/A            |
| Grenoble             | 94               | 90             | 61 (65%)    | 29 (31%)             | N/A            | N/A            |
| Cleveland (Adult)    | 141              | 65             | 10 (7%)     | 38 (27%)             | N/A            | 14 (10%)       |
| Cleveland (Paed.)    | 129              | 88             | 17 (13%)    | 48 (37%)             | N/A            | 18 (14%)       |
| Beijing              | 51               | 42             | 10 (20%)    | 19 (37%)             | N/A            | 13 (25%)       |
| Illinois             | 39               | 24             | 10 (26%)    | 14 (36%)             | N/A            | N/A            |
| GEBB, Erlangen       | 1354             | 972            | 246 (18%)   | 669 (49%)            | 5 (0.4%)       | 52 (4%)        |

**Online Resource 2:** Cumulative distribution function delta area plots for consensus clustering of expression **(a)** and methylation **(b)** data. To determine the optimum number of groups within each cohort, the  $k$  corresponding to the first downwards inflection in the cumulative distribution function plot was used. This represents the point at which further subdividing the cohort into additional groups explains little additional variability in the biological data.

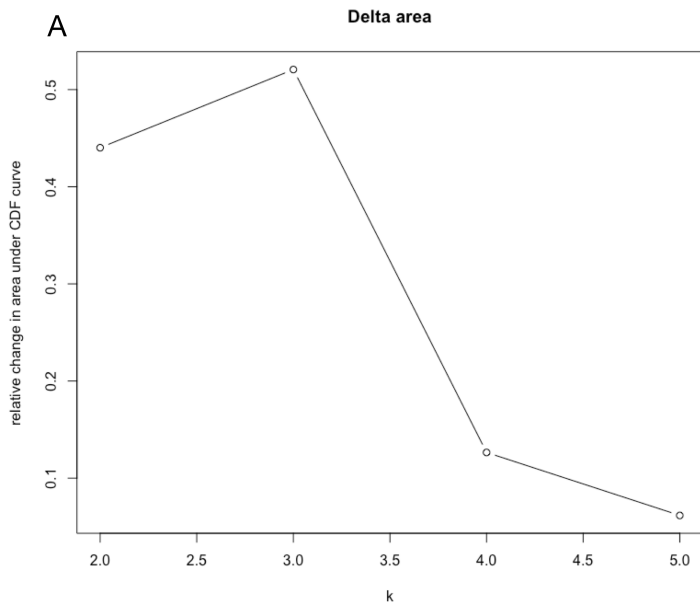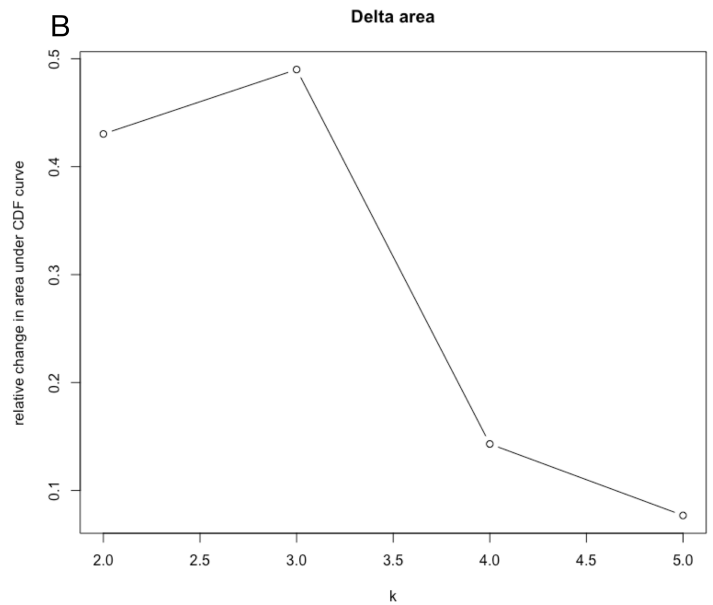

**Online Resource 3:** Gene set enrichment statistics for the comparison of astrocytic and oligodendrocyte precursor gene sets between Methyl Group 1 and 2 tumours. N = Number of genes within the gene set. DE = Number of differentially methylated gene set genes.

| <b>Gene set</b> | <b>N</b> | <b>DE</b> | <b>p-value</b> | <b>q-value</b> |
|-----------------|----------|-----------|----------------|----------------|
| Astrocyte       | 150      | 140       | > 0.005        | > 0.005        |
| OPC             | 150      | 139       | > 0.005        | > 0.005        |

**Online Resource 4:** Segregation of cases by immunohistochemistry for CCND1, CSPG4, and PDGFRA and concordance with molecular classification. Cases were reviewed and segregated into two groups by a pathologist blinded to molecular classification and histological diagnosis.

|            | GNT51 | GNT15 | GNT40 | GNT52 | GNT21 | GNT38 | GNT10 | GNT43 | GNT37 | GNT28 |
|------------|-------|-------|-------|-------|-------|-------|-------|-------|-------|-------|
| Mol. Class | 1     | 1     | 1     | 1     | 1     | 2     | 2     | 2     | 2     | 2     |
| CCND1      | 1     | 1     | 1     | 1     | 1     | 2     | 2     | 2     | 2     | 2     |
| CSPG4      | 1     | 1     | 1     | 1     | 1     | 2     | 2     | 2     | 2     | N/A   |
| PDGFRA     | 1     | 1     | 1     | 1     | 1     | 2     | 2     | 2     | 1     | 1     |

**Online Resource 5:** Summary of molecular findings for all cases classified by RNA sequencing and 450k methylation array.

| Sample | Histology | RNA/Meth   | Mol. Group    | Mutations                                                |
|--------|-----------|------------|---------------|----------------------------------------------------------|
| GNT21  | GG        | RNA        | RNA 1         | <i>BRAF-V600E</i>                                        |
| GNT41  | GG        | RNA        | RNA 1         | N/A                                                      |
| GNT45  | GG        | RNA        | RNA 1         | <i>BRAF-V600E</i>                                        |
| GNT51  | GG        | RNA        | RNA 1         | <i>BRAF-V600E, ASXL1-S1428P</i>                          |
| GNT15  | GG        | RNA        | RNA 1         | <i>BRAF-V600E</i>                                        |
| GNT19  | GNT NOS   | RNA        | RNA 1         | N/A                                                      |
| GNT40  | GNT NOS   | RNA        | RNA 1         | <i>BRAF-V600E</i>                                        |
| GNT44  | GNT NOS   | RNA        | RNA 1         | N/A                                                      |
| GNT47  | GNT NOS   | RNA        | RNA 1         | <i>ATM-V2696L</i>                                        |
| GNT52  | GNT NOS   | RNA        | RNA 1         | <i>BRAF-V600E, CTNNB1-G34E</i>                           |
| GNT32  | DNET      | RNA        | RNA 2         | N/A                                                      |
| GNT30  | GG        | RNA        | RNA 2         | <i>MYCN + CDK4 Amplified</i>                             |
| GNT28  | GNT NOS   | RNA        | RNA 2         | N/A                                                      |
| GNT43  | DNET      | RNA + Meth | RNA 2: Meth 2 | <i>FGFR1 Duplication, TP53-R282Q, TP53-N235S</i>         |
| GNT10  | DNET      | RNA + Meth | RNA 2: Meth 2 | <i>FGFR1 Duplication</i>                                 |
| GNT37  | DNET      | RNA + Meth | RNA 2: Meth 2 | <i>FGFR1-A334T</i>                                       |
| GNT38  | DNET      | RNA + Meth | RNA 2: Meth 2 | <i>FGFR1 Duplication, AKT1-E117 Del</i>                  |
| GNT24  | DNET      | RNA + Meth | RNA 2: Meth 2 | <i>FGFR1 E18 Inversion, MAP2K2-S127L</i>                 |
| GNT36  | GG        | RNA + Meth | RNA 2: Meth 2 | <i>HRAS-A134V, APC-E1209K, WT1-G60R</i>                  |
| GNT01  | GG        | Meth       | Meth 1        | <i>BRAF-V600E</i>                                        |
| GNT03  | GG        | Meth       | Meth 1        | <i>BRAF-V600E, ARID1B-Q17K</i>                           |
| GNT05  | GG        | Meth       | Meth 1        | <i>BRAF-V600E</i>                                        |
| GNT06  | GG        | Meth       | Meth 1        | N/A                                                      |
| GNT08  | GG        | Meth       | Meth 1        | <i>ARID1B-H92L</i>                                       |
| GNT09  | GG        | Meth       | Meth 1        | <i>BRAF-V600E</i>                                        |
| GNT11  | GNT NOS   | Meth       | Meth 1        | N/A                                                      |
| GNT12  | GG        | Meth       | Meth 1        | N/A                                                      |
| GNT13  | GG        | Meth       | Meth 1        | <i>NF1-L585 Frameshift</i>                               |
| GNT16  | GG        | Meth       | Meth 1        | <i>BRAF-V600E, ASXL1-R235W</i>                           |
| GNT17  | GG        | Meth       | Meth 1        | <i>BRAF-V600E</i>                                        |
| GNT18  | GG        | Meth       | Meth 1        | <i>BRAF-V600E, H3F3A-K27M</i>                            |
| GNT22  | GG        | Meth       | Meth 1        | <i>BRAF-V600E, CTNNB1-A39V</i>                           |
| GNT23  | DNET      | Meth       | Meth 1        | <i>FGFR1 Duplication, MLL2-R3596W</i>                    |
| GNT29  | GG        | Meth       | Meth 1        | <i>BRAF-V600E</i>                                        |
| GNT35  | GG        | Meth       | Meth 1        | <i>BRAF-V600E, FGFR2-Q779A, CDKN2A/B Del, ATM-R2461C</i> |
| GNT48  | GG        | Meth       | Meth 1        | <i>BRAF-V600E</i>                                        |
| GNT56  | GG        | Meth       | Meth 1        | N/A                                                      |
| GNT57  | GG        | Meth       | Meth 1        | N/A                                                      |
| GNT58  | GG        | Meth       | Meth 1        | N/A                                                      |
| GNT42  | GG        | Meth       | Meth 1        | <i>HIST1H3B-M121T</i>                                    |
| GNT02  | GNT NOS   | Meth       | Meth 2        | N/A                                                      |
| GNT07  | GNT NOS   | Meth       | Meth 2        | <i>FGFR1 Duplication</i>                                 |
| GNT14  | GNT NOS   | Meth       | Meth 2        | <i>FGFR1 Duplication</i>                                 |
| GNT20  | GNT NOS   | Meth       | Meth 2        | N/A                                                      |
| GNT25  | GNT NOS   | Meth       | Meth 2        | N/A                                                      |
| GNT26  | GNT NOS   | Meth       | Meth 2        | N/A                                                      |
| GNT33  | DNET      | Meth       | Meth 2        | <i>FGFR1 Duplication</i>                                 |
| GNT34  | DNET      | Meth       | Meth 2        | N/A                                                      |
| GNT49  | GG        | Meth       | Meth 2        | <i>ARID1A-158S, ACVR1-V435 Del</i>                       |
| GNT31  | DNET      | Meth       | Meth 2        | <i>FGFR1-L567E, ATM-R1039L</i>                           |
